# Supplementary material
Source: bioRxiv or medRxiv preprint supplement (https://medrxiv.org/highwire/filestream/80195/field_highwire_adjunct_files/0/2020.04.14.20065276-1.pdf)
Supplement: Supplementary file [file 2020.04.14.20065276-1.pdf]

# Publication bias

Funnel Plot of Standard Error by Logit event rate

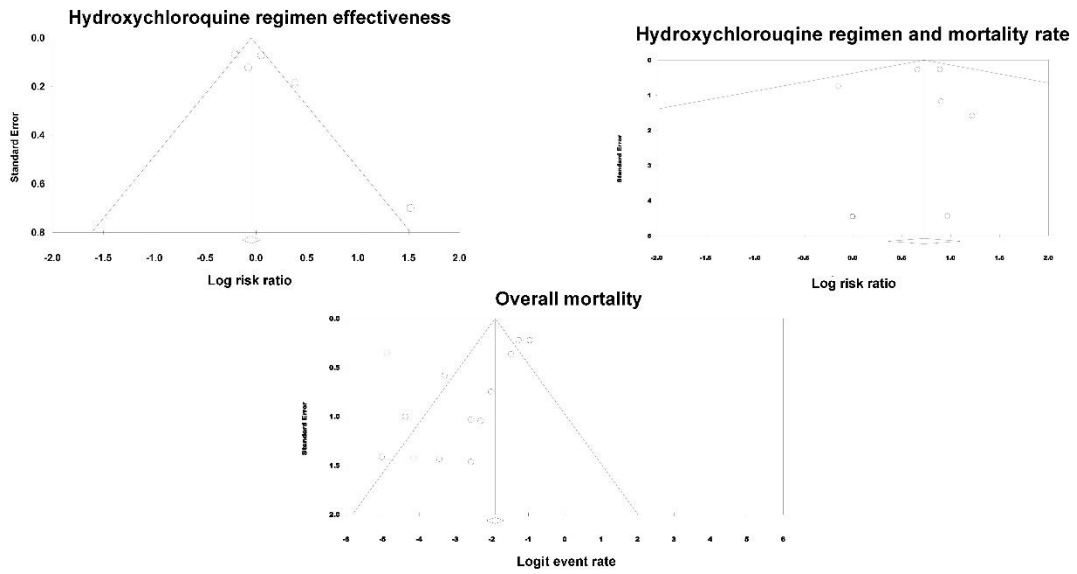

Supplementary Figure 1. The funnel plot for publication bias

## Sensitivity analysis for hydroxychloroquine regimen effectiveness

### Risk Ratio

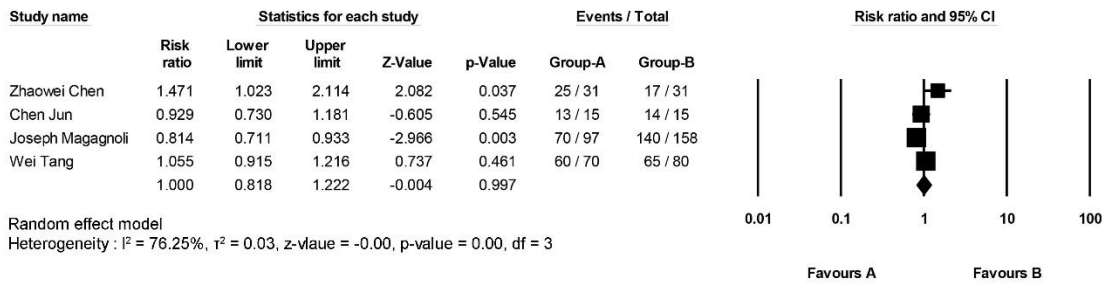

### Risk Difference

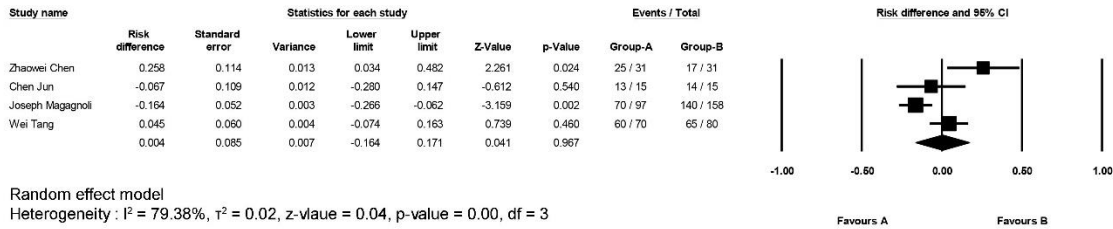

Group-A : Hydroxychloroquine  
Group-B : Control

Supplementary Figure 2. Sensitivity analysis No.1 for hydroxychloroquine regimen effectiveness

### Risk Ratio

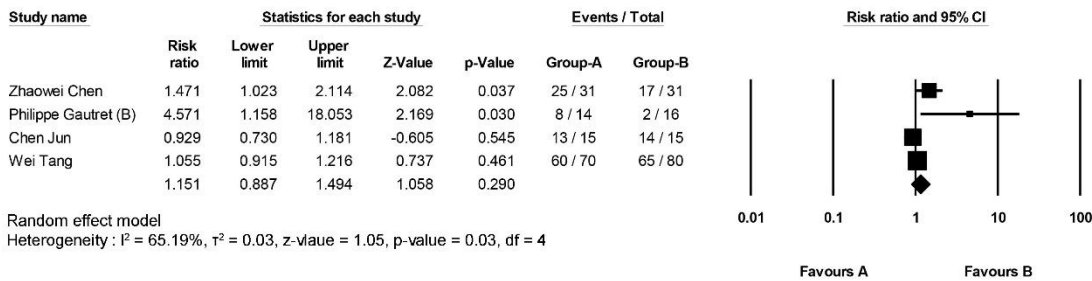

### Risk Difference

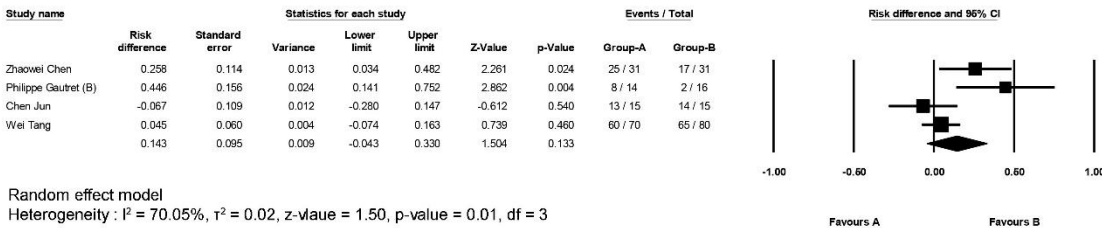

Group-A : Hydroxychloroquine  
Group-B : Control

Supplementary Figure 3. Sensitivity analysis No.2 for hydroxychloroquine regimen effectiveness

## Risk Ratio

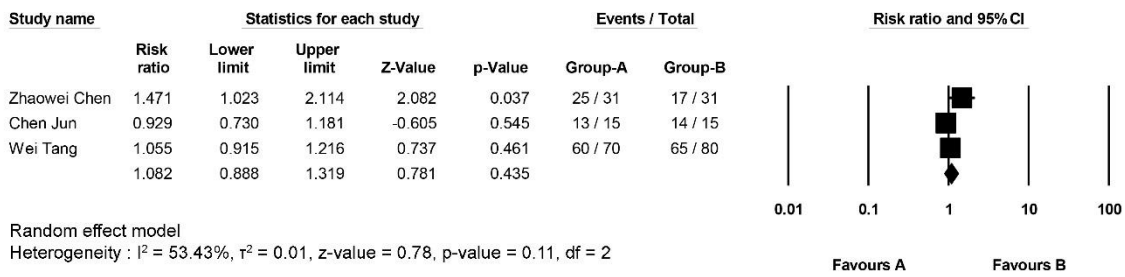

## Risk Difference

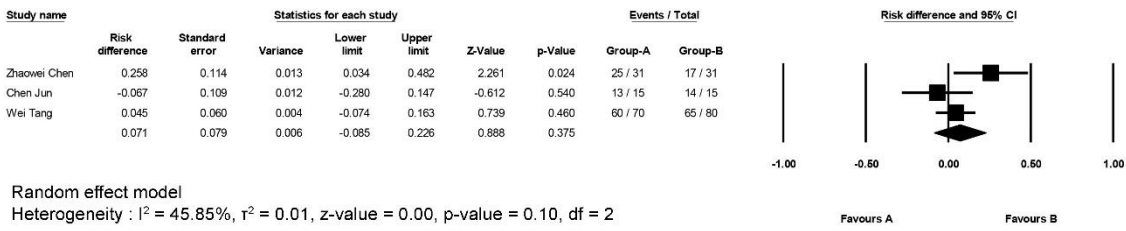

Group-A : Hydroxychloroquine  
Group-B : Control

Supplementary Figure 4. Sensitivity analysis No.3 for hydroxychloroquine regimen effectiveness

# Sensitivity analysis for hydroxychloroquine regimen mortality

## Risk Ratio

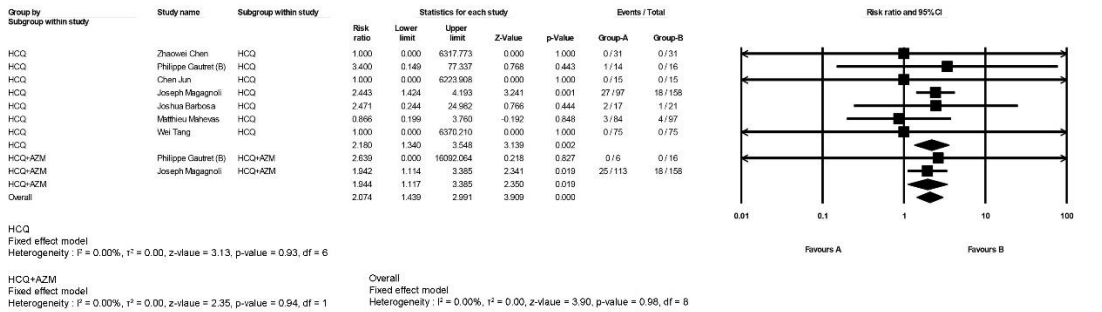

## Risk Difference

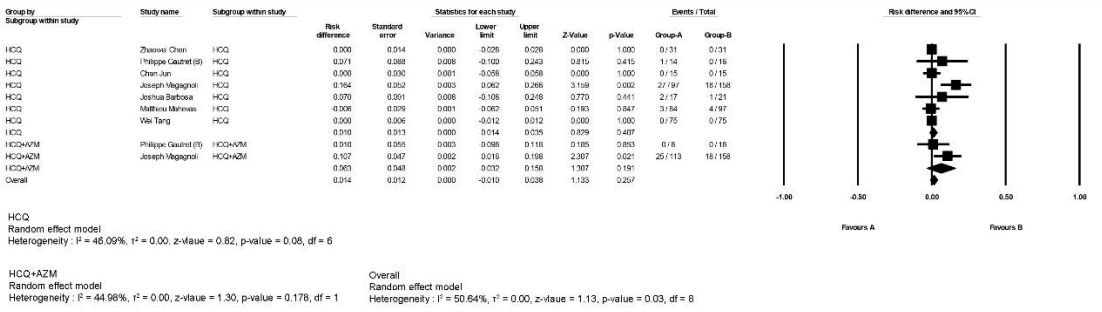

HCQ : Hydroxychloroquine  
AZM : Azithromycin

Supplementary Figure 5. Sensitivity analysis No.1 for hydroxychloroquine regimen mortality

## Risk Ratio

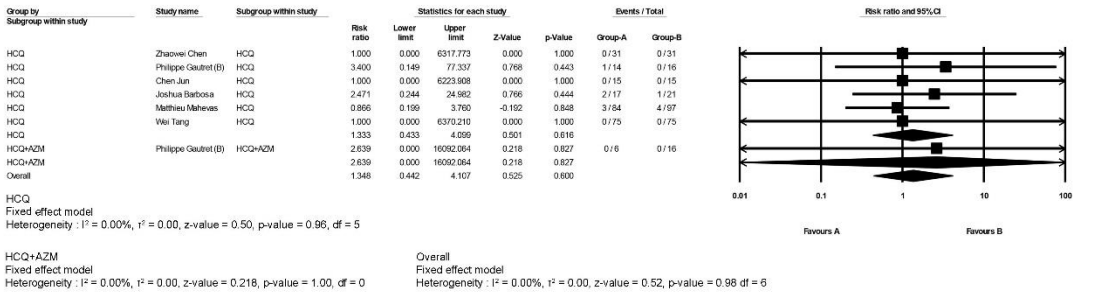

## Risk Difference

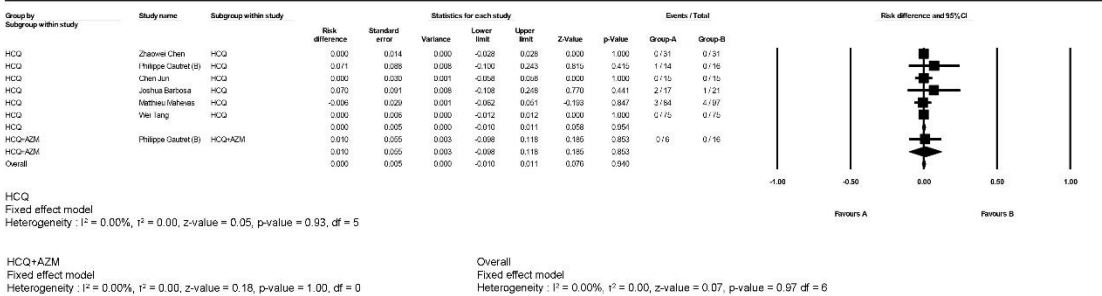

HCQ : Hydroxychloroquine  
AZM : Azithromycin

Supplementary Figure 6. Sensitivity analysis No.2 for hydroxychloroquine regimen mortality
